# Supplementary material for: Structure and dynamics of ions in dipolar solvents: a coarse-grained simulation study
Source: Royal Society of Chemistry journal article supplement (doi:10.1039/d1sm00583a), 2021-01-01
Supplement: d1sm00583a1.pdf [file d1sm00583a1.pdf]

## Supplementary Materials

### Structure and dynamics of ions in dipolar solvents: a coarse-grained simulation study

Jicai Liang<sup>a</sup>, Hao Wei<sup>ab</sup>, Kaifeng Yu<sup>\*a</sup>, Chengjiang Lin<sup>bc</sup>, Hongfei Li<sup>bc</sup>,

Mingming Ding<sup>\*d</sup> and Xiaozheng Duan<sup>\*b</sup>

<sup>a</sup> Key Laboratory of Automobile Materials, Ministry of Education and College of Materials Science and Engineering, Jilin University, Changchun, Jilin 130025, China. E-mail: yukf@jlu.edu.cn

<sup>b</sup> State Key Laboratory of Polymer Physics and Chemistry, Changchun Institute of Applied Chemistry, Chinese Academy of Sciences, Changchun, Jilin 130022, China. E-mail: xzduan@ciac.ac.cn

<sup>c</sup> School of Applied Chemistry and Engineering, University of Science and Technology of China, Hefei 230026, P. R. China.

<sup>d</sup> School of Chemical Engineering and Light Industry, Guangdong University of Technology, Guangzhou 510006, China. E-mail: mmding@gdut.ac.cn

\* Corresponding authors.

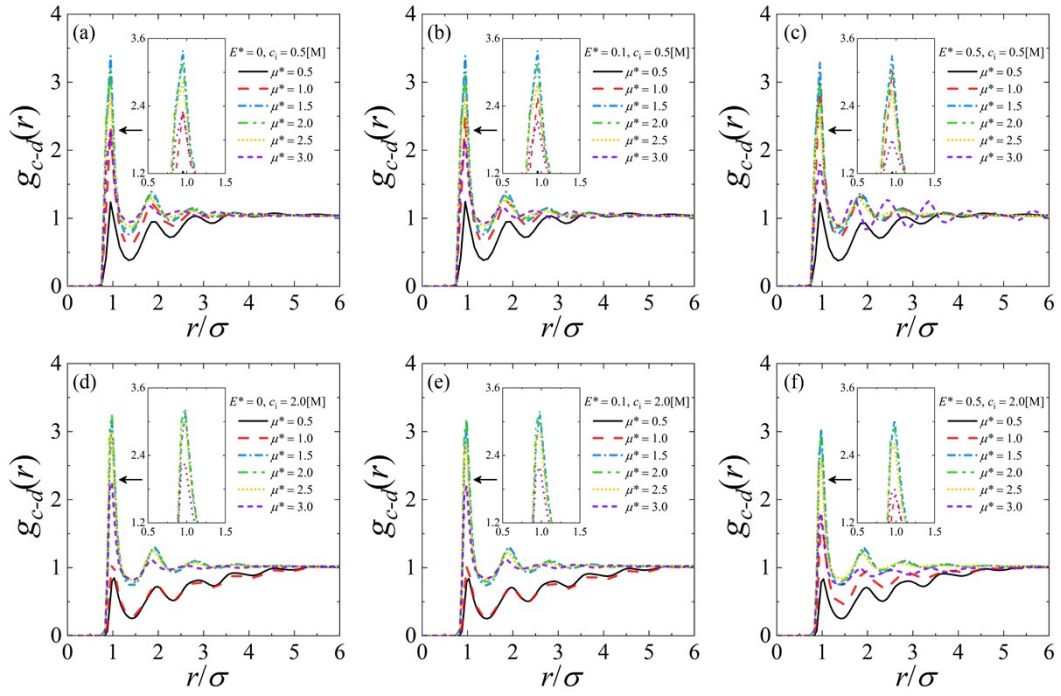

**Fig. S1** Radial distribution functions of dipoles around each cation [ $g_{c-d}(r)$ ] at different dipole moments ( $\mu^*$ ), ionic concentrations ( $c_i$ ) and magnitudes of the external electrostatic field ( $E^*$ ). The line colors correspond to the values of the dipole moments. (a)  $c_i = 0.5$  [M],  $E^* = 0$ , (b)  $c_i = 0.5$  [M],  $E^* = 0.1$ , (c)  $c_i = 0.5$  [M],  $E^* = 0.5$ , (d)  $c_i = 2.0$  [M],  $E^* = 0$ , (e)  $c_i = 2.0$  [M],  $E^* = 0.1$ , and (f)  $c_i = 2.0$  [M],  $E^* = 0.5$ .

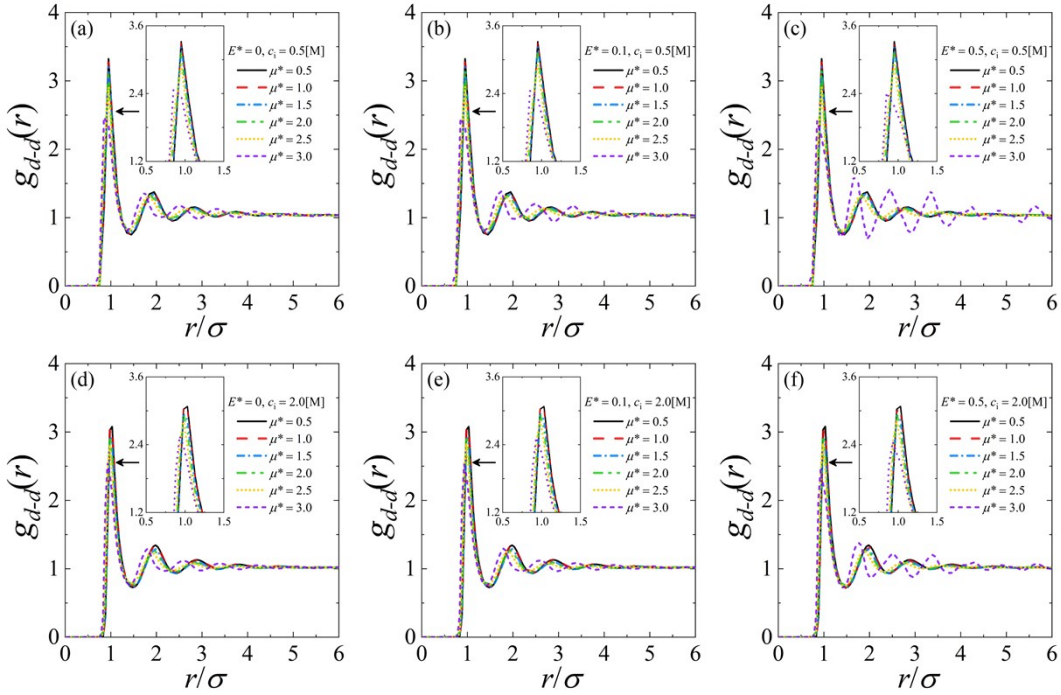

**Fig. S2** Radial distribution functions of dipoles around each dipole [ $g_{d-d}(r)$ ] at different dipole moments ( $\mu^*$ ), ionic concentrations ( $c_i$ ) and magnitudes of the external electrostatic field ( $E^*$ ). The line colors correspond to the values of the dipole moments.

correspond to the values of the dipole moments. (a)  $c_i = 0.5$  [M],  $E^* = 0$ , (b)  $c_i = 0.5$  [M],  $E^* = 0.1$ , (c)  $c_i = 0.5$  [M],  $E^* = 0.5$ , (d)  $c_i = 2.0$  [M],  $E^* = 0$ , (e)  $c_i = 2.0$  [M],  $E^* = 0.1$ , and (f)  $c_i = 2.0$  [M],  $E^* = 0.5$ .

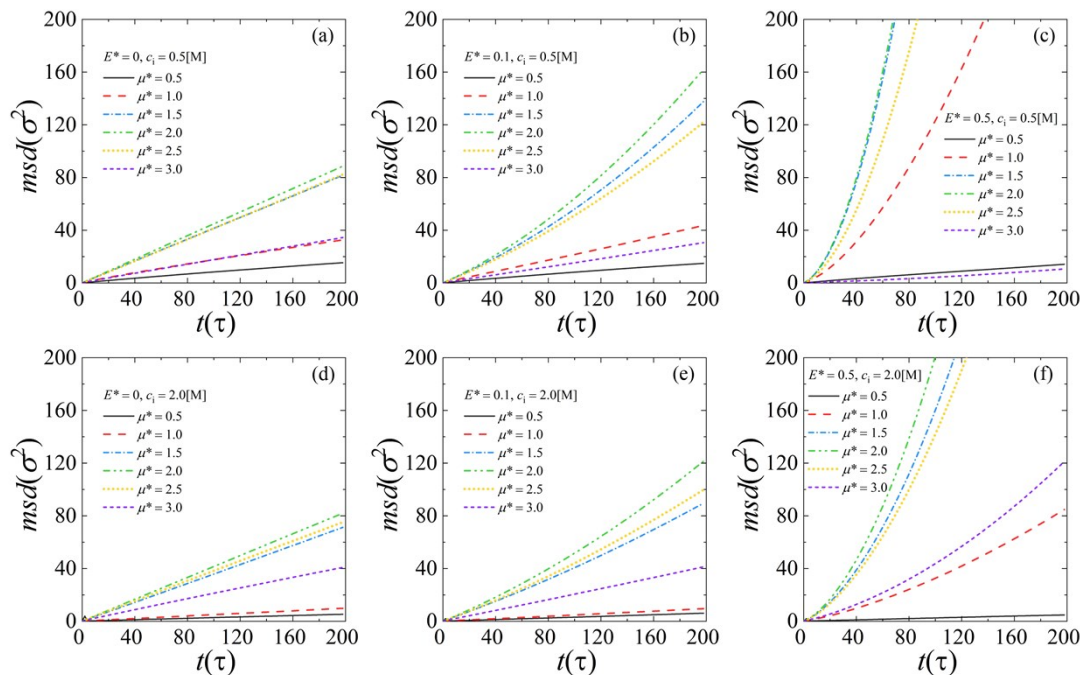

**Fig. S3** Mean-squared displacement of cations as a function of simulation time. The line colors correspond to the values of the dipole moments. (a)  $c_i = 0.5$  [M],  $E^* = 0$ , (b)  $c_i = 0.5$  [M],  $E^* = 0.1$ , (c)  $c_i = 0.5$  [M],  $E^* = 0.5$ , (d)  $c_i = 2.0$  [M],  $E^* = 0$ , (e)  $c_i = 2.0$  [M],  $E^* = 0.1$ , and (f)  $c_i = 2.0$  [M],  $E^* = 0.5$ .

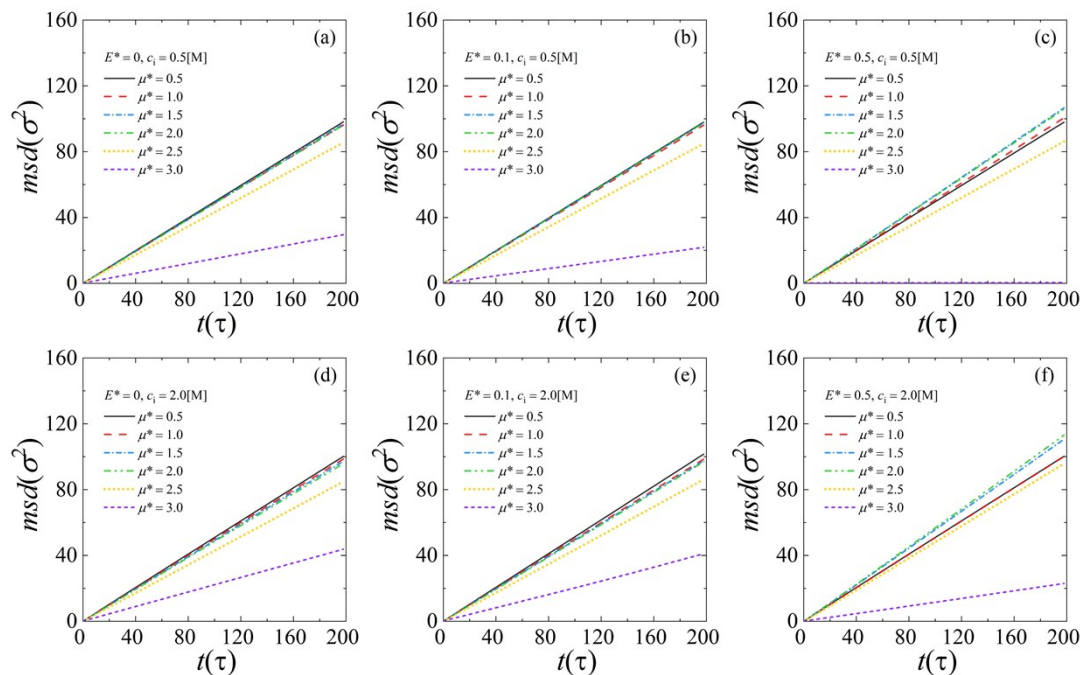

**Fig. S4** Mean-squared displacement of dipoles as a function of simulation time. The line colors correspond to the values of the dipole moments. (a)  $c_i = 0.5$  [M],  $E^* = 0$ , (b)  $c_i = 0.5$  [M],  $E^* = 0.1$ , (c)  $c_i = 0.5$  [M],  $E^* = 0.5$ , (d)  $c_i = 2.0$  [M],  $E^* = 0$ , (e)  $c_i = 2.0$  [M],  $E^* = 0.1$ , and (f)  $c_i = 2.0$  [M],  $E^* = 0.5$ .

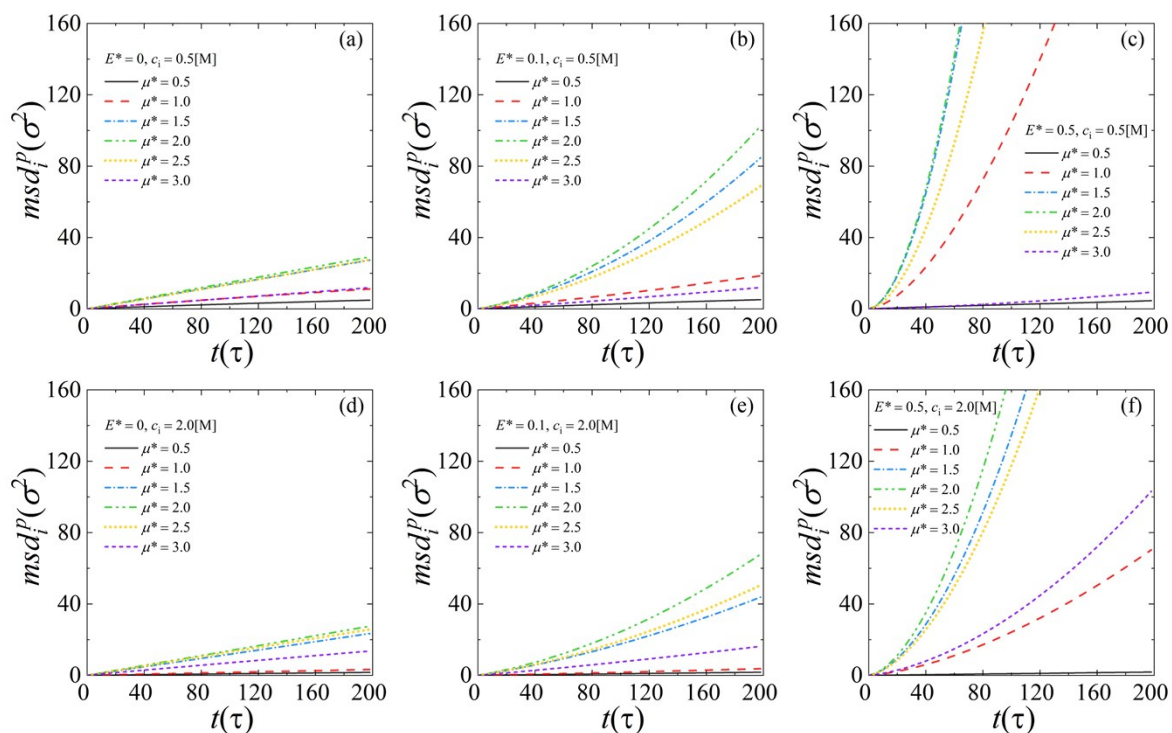

**Fig. S5** The components of Mean-squared displacement of cations in directions parallel to the electric field as a function of simulation time. The line colors correspond to the values of the dipole moments. (a)  $c_i = 0.5$  [M],  $E^* = 0$ , (b)  $c_i = 0.5$  [M],  $E^* = 0.1$ , (c)  $c_i = 0.5$  [M],  $E^* = 0.5$ , (d)  $c_i = 2.0$  [M],  $E^* = 0$ , (e)  $c_i = 2.0$  [M],  $E^* = 0.1$ , and (f)  $c_i = 2.0$  [M],  $E^* = 0.5$ .

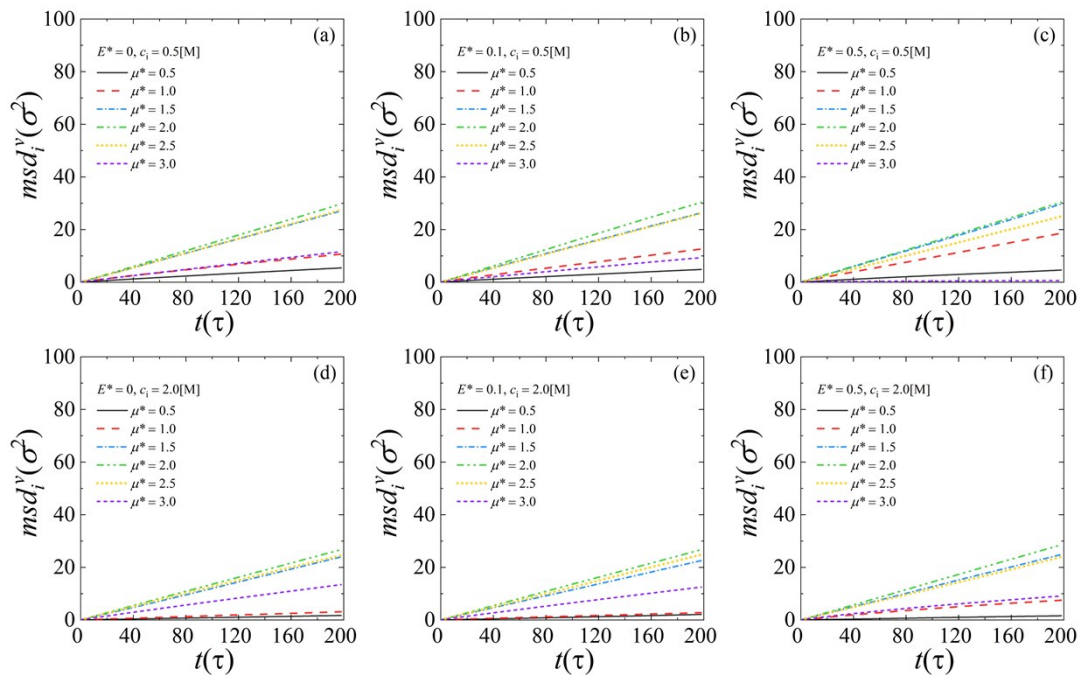

**Fig. S6** The components of Mean-squared displacement of cations in directions vertical to the electric field as a function of simulation time. The line colors correspond to the values of the dipole moments. (a)  $c_i =$

0.5 [M],  $E^* = 0$ , (b)  $c_i = 0.5$  [M],  $E^* = 0.1$ , (c)  $c_i = 0.5$  [M],  $E^* = 0.5$ , (d)  $c_i = 2.0$  [M],  $E^* = 0$ , (e)  $c_i = 2.0$  [M],  $E^* = 0.1$ , and (f)  $c_i = 2.0$  [M],  $E^* = 0.5$ .

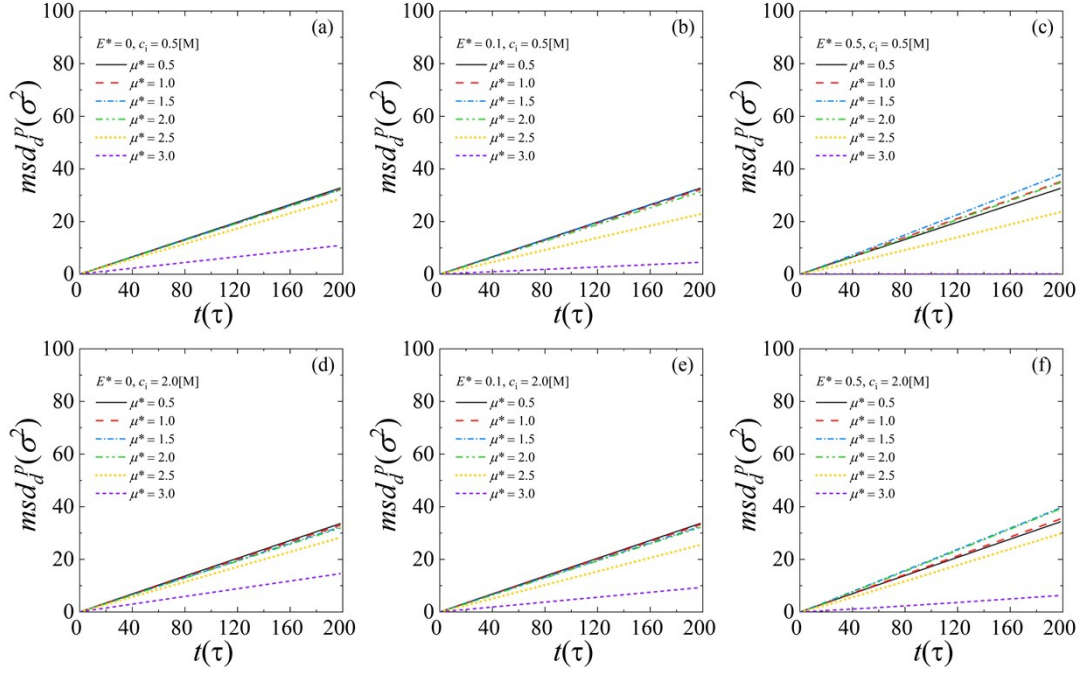

**Fig. S7** The components of Mean-squared displacement of dipoles in directions parallel to the electric field as a function of simulation time. The line colors correspond to the values of the dipole moments. (a)  $c_i = 0.5$  [M],  $E^* = 0$ , (b)  $c_i = 0.5$  [M],  $E^* = 0.1$ , (c)  $c_i = 0.5$  [M],  $E^* = 0.5$ , (d)  $c_i = 2.0$  [M],  $E^* = 0$ , (e)  $c_i = 2.0$  [M],  $E^* = 0.1$ , and (f)  $c_i = 2.0$  [M],  $E^* = 0.5$ .

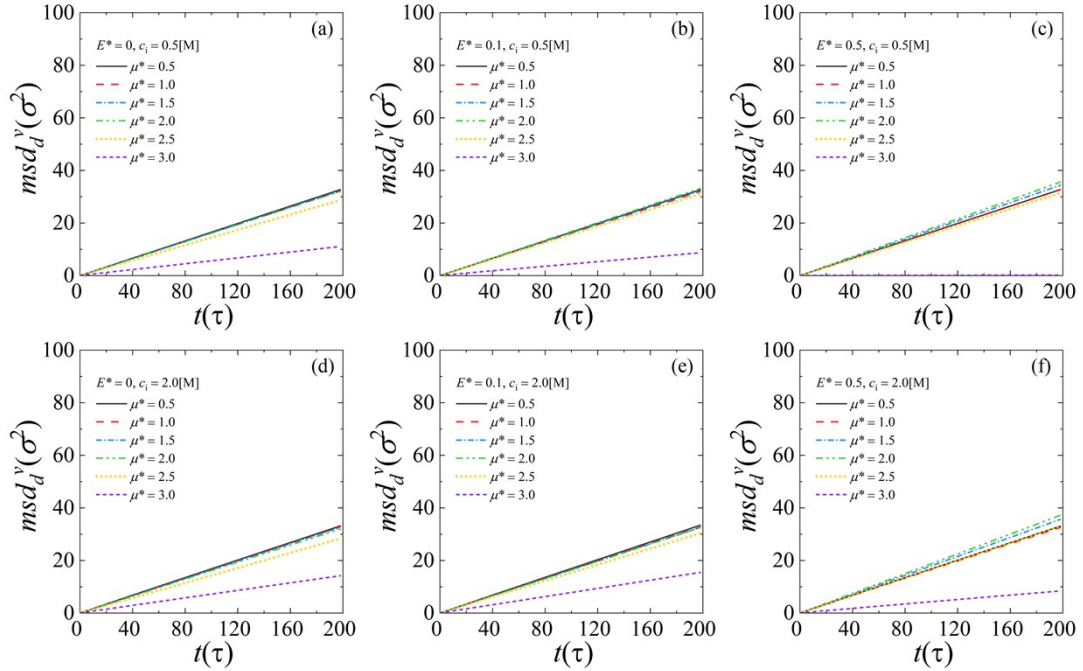

**Fig. S8** The components of Mean-squared displacement of dipoles in directions vertical to the electric field as a function of simulation time. The line colors correspond to the values of the dipole moments. (a)  $c_i =$

0.5 [M],  $E^* = 0$ , (b)  $c_i = 0.5$  [M],  $E^* = 0.1$ , (c)  $c_i = 0.5$  [M],  $E^* = 0.5$ , (d)  $c_i = 2.0$  [M],  $E^* = 0$ , (e)  $c_i = 2.0$  [M],  $E^* = 0.1$ , and (f)  $c_i = 2.0$  [M],  $E^* = 0.5$ .
